# Supplementary material for: Risk factors for miscarriage among women attending an early pregnancy assessment unit (EPAU): a prospective cohort study
Source: Springer Nature journal article supplement (doi:10.1007/s11845-018-1955-2), 2019-01-03
Supplement: MOESM1 [file 16373318]

**Supplemental Table 1. Odds Ratios for miscarriage (<24 weeks): General health and lifestyles behaviours.**

|  | **Pregnancy**  *n* **(%)** | **Miscarriage**  *n* **(%)** | **Model I**  **OR**  **(95% CI)** | **P-value** | **Model II**  **OR**  **(95% CI)** | **P-value** |
| --- | --- | --- | --- | --- | --- | --- |
| **BMI (kg/m2)*** | n=148 | n=123 |  |  |  |  |
| BMI (mean, SD) | 26.9 (5.0) | 30.1 (22.8) | 1.0 (0.99-1.08) | 0.093 | 1.1 (1.02-1.14) | 0.013 |
| **General Health** | n=159 | n=134 |  |  |  |  |
| Very good/good | 152 (55.5) | 122 (44.5) | 1.0 |  | 1.0 |  |
| Fair/poor | 7 (36.8) | 12 (63.2) | 2.1 (0.8-5.6) | 0.122 | 1.1 (0.3-4.3) | 0.848 |
| **Medical illness** | n=156 | n=129 |  |  |  |  |
| No | 127 (55.9) | 100 (44.1) | 1.0 |  | 1.0 |  |
| Yes | 29 (50.0) | 29 (50.0) | 1.3 (0.7-2.3) | 0.417 | 1.5 (0.7-3.5) | 0.327 |
| **Diagnosis of anxiety** | n=95 | n=73 |  |  |  |  |
| No | 83 (57.2) | 62 (42.8) | 1.0 |  | 1.0 |  |
| Yes | 12 (52.2) | 11 (47.8) | 1.3 (0.5-3.0) | 0.649 | 2.4 (0.6-9.5) | 0.223 |
| **Diagnosis of depression** | n=96 | n=73 |  |  |  |  |
| No | 74 (56.5) | 57 (43.5) | 1.0 |  | 1.0 |  |
| Yes | 22 (57.9) | 16 (42.1) | 0.9 (0.5-2.0) | 0.878 | 0.9 (0.3-2.8) | 0.914 |
| **Regular medication** | n=153 | n=126 |  |  |  |  |
| No | 115 (58.1) | 83 (41.9) | 1.0 |  | 1.0 |  |
| Yes | 38 (46.9) | 43 (53.1) | 1.6 (0.9-2.6) | 0.090 | 1.5 (0.7-3.2) | 0.281 |
| **Flight abroad in early pregnancy** | n=127 | n=155 | 1.1 (0.56-2.1) |  |  |  |
| No | 131 (57.2) | 98 (42.8) | 1.0 |  | 1.0 |  |
| Yes | 24 (45.3) | 29 (54.7) | 1.6 (0.9-2.9) | 0.118 | 1.5 (0.6-3.7) | 0.394 |
| **Physical activity**** | n=153 | n=128 |  |  |  |  |
| Unchanged | 85 (55.9) | 67 (44.1) | 1.0 |  | 1.0 |  |
| Decreased | 68 (52.7) | 61 (47.3) | 1.1 (0.7-1.8) | 0.591 | 1.0 (0.5-2.1) | 0.944 |
| **Hours per day watching TV** | n=159 | n=132 |  |  |  |  |
| Less than 2 hours | 53 (54.1) | 45 (45.9) | 1.0 |  | 1.0 |  |
| 2 or more hours | 106 (54.9) | 87 (45.1) | 1.4 (0.7-1.8) | 0.591 | 1.0 (0.5-2.1) | 0.971 |
| **Workplace stressful** | n=118 | n=98 |  |  |  |  |
| Never | 28 (73.7) | 10 (26.3) | 1.0 |  | 1.0 |  |
| Sometimes/often | 90 (50.6) | 88 (49.4) | 2.7 (1.3-5.9) | 0.011 | 3.4 (1.0-11.1) | 0.046 |
| **Work hours** | n=120 | n=96 |  |  |  |  |
| Less than 40 hours | 100 (58.1) | 72 (41.9) | 1.0 |  | 1.0 |  |
| 40 hours or more | 20 (45.5) | 24 (54.5) | 1.7 (0.9-3.2) | 0.133 | 1.5 (0.6-4.1) | 0.412 |
| **Physically demanding job** | n=141 | n=110 |  |  |  |  |
| No | 93 (55.4) | 75 (44.6) | 1.0 |  | 1.0 |  |
| Yes | 48 (57.8) | 35 (42.2) | 1.1 (0.7-1.9) | 0.710 | 0.9 (0.4-1.9) | 0.847 |
| **Working with a computer screen** | n=142 | n=112 |  |  |  |  |
| No | 63 (63.6) | 36 (36.4) | 1.0 |  | 1.0 |  |
| Yes | 79 (51.0) | 76 (49.0) | 1.6 (1.0-2.8) | 0.048 | 1.6 (0.7-3.6) | 0.255 |
|  |  |  |  |  |  |  |
| **No. of hours working with computer per week** | n=82 | n=73 |  |  |  |  |
| 20 hours or less | 42 (52.5) | 38 (47.5) | 1.0 |  | 1.0 |  |
| More than 20 hours | 40 (53.3) | 35 (46.7) | 1.0 (0.5-1.8) | 0.917 | 0.9 (0.3-2.5) | 0.881 |
| Mean, SD | 21.1 (13.6) | 20.2 (13.7) | 1.0 (1.0-1.0) | 0.699 | 0.9 (0.3-2.5) | 0.881 |
| **Lifting between 11 – 20 kg at a time** | n=138 | n=107 |  |  |  |  |
| No | 106 (55.8) | 84 (44.2) | 1.0 |  | 1.0 |  |
| Yes | 32 (58.2) | 23 (41.8) | 1.1 (0.6-1.1) | 0.753 | 0.9 (0.4-2.3) | 0.910 |
| **Lifting between 11 to 20 kg at work (times)** | n=32 | n=21 |  |  |  |  |
| 4 times or less | 21 (67.7) | 10 (32.3) | 1.0 |  | 1.0 |  |
| More than 4 times | 11 (50.0) | 11 (50.0) | 2.1 (0.7-6.4) | 0.196 | 0.7 (0.1-5.4) | 0.737 |
| Mean, SD |  |  | 1.0 (0.9-1.1) | 0.927 | 1.0 (0.8-1.3) | 0.763 |
| **Lifting more than 20 kg at a time** | n=131 | n=102 |  |  |  |  |
| No | 123 (56.4) | 95 (43.6) | 1.0 |  | 1.0 |  |
| Yes | 8 (53.3) | 7 (46.7) | 0.9 (0.3-2.5) | 0.816 | 0.8 (0.1-5.7) | 0.862 |
| **Lifting more than 20 kg at work (times)***** | n=6 | n=6 |  |  |  |  |
| 3 times or less | 2 (28.6) | 5 (71.4) | 1.0 |  | 1.0 |  |
| More than 3 times | 4 (80.0) | 1 (20.0) | 0.1 (0.006-1.6) | 0.099 | - | - |
| Mean, SD |  |  | 0.6 (0.3-1.3) | 0.201 | - | - |
| **Frequency of practicing physical activities** | n=159 | n=134 |  |  |  |  |
| No exercise | 30 (50.8) | 29 (49.2) | 1.0 |  | 1.0 |  |
| At least once per week (any exercise) | 129 (55.1) | 105 (44.9) | 0.8 (0.5-1.5) | 0.556 | 0.5 (0.2-1.2) | 0.115 |
| **Exercise per week (minutes)** | n=117 | n=93 |  |  |  |  |
| 1-60 minutes | 89 (57.1) | 67 (42.9) | 1.0 |  | 1.0 |  |
| 61 minutes or more | 28 (51.9) | 26 (48.1) | 1.2 (0.7-2.3) | 0.508 | 1.1 (0.4-2.9) | 0.907 |
| Mean (SD) | 41.7 (72.9) | 48.8 (69.7) | 1.0 (1.0-1.0) | 0.292 | 1.0 (1.0-1.0) | 0.773 |
| **Drinking coffee** | n=156 | n=130 |  |  |  |  |
| No, never | 67 (55.8) | 53 (44.2) | 1.0 |  | 1.0 |  |
| Yes, current or before preg. | 89 (53.6) | 77 (46.4) | 1.1 (0.7-1.8) | 0.710 | 1.4 (0.7-2.9) | 0.331 |
| **Coffee before getting pregnant** | n=88 | n=72 |  |  |  |  |
| Less than 4 cups/day | 75 (56.4) | 58 (43.6) | 1.0 |  | 1.0 |  |
| 4 cups/day or more | 13 (48.1) | 14 (51.9) | 1.4 (0.6-3.1) | 0.434 | 0.6 (0.2-2.2) | 0.443 |
| **Coffee early in pregnancy** | n=88 | n=76 |  |  |  |  |
| No, I don’t | 38 (55.9) | 30 (44.1) | 1.0 |  | 1.0 |  |
| Yes, I drink coffee early in preg. | 50 (52.1) | 46 (47.9) | 1.2 (0.6-2.1) | 0.631 | 1.3 (0.6-3.4) | 0.546 |
| **Drinking tea** | n=156 | n=126 |  |  |  |  |
| No, never | 30 (49.2) | 31 (50.8) | 1.0 |  | 1.0 |  |
| Yes, current or before preg. | 126 (57.0) | 95 (43.0) | 0.7 (0.4-1.3) | 0.277 | 1.0 (0.4-2.5) | 0.954 |
| **Tea before getting pregnant** | n=123 | n=95 |  |  |  |  |
| Less than 4 cups/day | 93 (55.0) | 76 (45.0) | 1.0 |  | 1.0 |  |
| 4 cups/day or more | 30 (61.2) | 19 (38.8) | 0.8 (0.4-1.5) | 0.442 | 0.7 (0.3-1.8) | 0.450 |
| **Tea early in pregnancy** | n=127 | n=96 |  |  |  |  |
| No, never | 17 (58.6) | 12 (41.4) | 1.0 |  | 1.0 |  |
| Yes, I drink tea early in preg. | 110 (56.7) | 84 (43.3) | 1.1 (0.5-2.4) | 0.846 | 1.1 (0.3-4.3) | 0.896 |
| **Drinking cola** | n=155 | n=130 |  |  |  |  |
| No, never | 90 (50.6) | 88 (49.4) | 1.0 |  | 1.0 |  |
| Yes, current or before preg | 65 (60.7) | 42 (39.3) | 0.7 (0.4-1.1) | 0.095 | 0.7 (0.3-1.4) | 0.281 |
| **Cola before getting pregnant** | n=57 | n=38 |  |  |  |  |
| Less than 4 cups/day | 50 (59.5) | 34 (40.5) | 1.0 |  | 1.0 |  |
| 4 cups/day or more | 7 (63.6) | 4 (36.4) | 0.7 (0.2-3.1) | 0.794 | 1.0 (0.1-8.0) | 0.983 |
| **Cola early in pregnancy** | n=60 | n=39 |  |  |  |  |
| No, never | 29 (65.9) | 15 (34.1) | 1.0 |  | 1.0 |  |
| Yes, I drink tea | 31 (56.4) | 24 (43.6) | 1.5 (0.7-3.4) | 0.335 | 1.8 (0.6-6.0) | 0.326 |
| **Vegetables eaten** | n=158 | n=130 |  |  |  |  |
| Once every day or more times | 109 (54.0) | 93 (46.0) | 1.0 |  | 1.0 |  |
| Most day or less than a week | 49 (57.0) | 37 (43.0) | 0.9 (0.5-1.5) | 0.638 | 0.8 (0.4-1.7) | 0.562 |
| **Fruit eaten** | n=158 | n=132 |  |  |  |  |
| Once every day or more times | 99 (52.1) | 91 (47.9) | 1.0 |  | 1.0 |  |
| Most day or less than a week | 59 (59.0) | 41 (41.0) | 0.8 (0.5-1.2) | 0.263 | 0.9 (0.4-1.9) | 0.736 |
| **Drinking behaviour** | n=157 | n=129 |  |  |  |  |
| Never drink | 21 (56.8) | 16 (43.2) | 1.0 |  | 1.0 |  |
| Drinking now or before pregnancy | 136 (54.6) | 113 (45.4) | 1.1 (0.6-2.2) | 0.807 | 1.2 (0.4-3.5) | 0.742 |
| **Units per week early pregnancy** | n=60 | n=58 |  |  |  |  |
| 2 units or less per week | 52 (51.5) | 49 (48.5) | 1.0 |  | 1.0 |  |
| More than 2 units per week | 8 (47.1) | 9 (52.9) | 1.2 (0.5-3.3) | 0.736 | 1.0 (0.2-5.9) | 0.999 |
| **Binge drinking** | n=68 | n=59 |  |  |  |  |
| No, never | 54 (54.5) | 45 (45.5) | 1.0 |  | 1.0 |  |
| Yes, more than 5 drinks/day | 14 (50.0) | 14 (50.0) | 1.2 (0.5-2.8) | 0.670 | 0.9 (0.3-3.4) | 0.866 |
| **Smoking behaviour** | n=154 | n=124 |  |  |  |  |
| Never smoke | 79 (54.9) | 65 (45.1) | 1.0 |  | 1.0 |  |
| Smoking now or before pregnancy | 75 (56.0) | 59 (44.0) | 1.0 (0.6-1.5) | 0.853 | 0.8 (0.4-1.6) | 0.477 |
| **Smoking behaviour** | n=26 | n=24 |  |  |  |  |
| 4 or less cigarettes per day | 6 (54.5) | 5 (45.5) | 1.0 |  | 1.0 |  |
| More than 4 cigarettes per day | 20 (51.3) | 19 (48.7) | 1.2 (0.3-4.4) | 0.848 | 0.7 (0.06-7.8) | 0.770 |
| **Drug use** | n=158 | n=127 |  |  |  |  |
| Never took drug | 156 (55.7) | 124 (44.3) | 1.0 |  | 1.0 |  |
| Drug use now or before pregnancy | 2 (40.0) | 3 (60.0) | 1.9 (0.3-11.5) | 0.490 | - | - |

* Only one case was underweight, so we excluded it from the analysis; ** Physical activity changed during most recent pregnancy: no participants reported to increase their levels of physical activity; *** Excluded from multivariate model as a highly imprecise odds ratio was reported.

Model I: Univariate unadjusted model

Model II: Multivariate model adjusted for maternal age (continuous), presentation (dichotomous), previous miscarriage (dichotomous), nausea and vomiting (dichotomous), BMI (continuous).

**Supplemental Table 2. Odds Ratios for miscarriage (<24 weeks): Partners’ characteristics.**

|  | **Pregnancy** *n* **(%)** | **Miscarriage**  *n* **(%)** | **Model I**  **OR**  **(95% CI)** | **P-value** | **Model II**  **OR**  **(95% CI)** | **P-value** |
| --- | --- | --- | --- | --- | --- | --- |
| **Partners' age** | n=150 | n=125 |  |  |  |  |
| Less than 35 years old | 87 (61.7) | 54 (38.3) | 1.0 |  | 1.0 |  |
| 35 years old or older | 63 (47.0) | 71 (53.0) | 1.8 (1.1-2.9) | 0.015 | 1.9 (0.9-4.1) | 0.119 |
| Mean, SD | 33.5 (6.0) | 34.6 (5.8) | 1.0 (1.0-1.1) | 0.123 | 1.1 (1.0-1.1) | 0.247 |
| **Partners' ethnicity** | n=152 | n=125 |  |  |  |  |
| White background (Irish/other) | 141 (55.1) | 115 (44.9) | 1.0 |  | 1.0 |  |
| Other background | 11 (52.4) | 10 (47.6) | 1.1 (0.5-2.7) | 0.811 | 1.7 (0.4-7.5) | 0.509 |
| **Partners employment** | n=120 | n=147 |  |  |  |  |
| Full-time paid job | 105 (56.1) | 82 (43.9) | 1.0 |  | 1.0 |  |
| Part-time/unemployed/student | 42 (52.5) | 38 (47.5) | 1.2 (0.7-2.0) | 0.583 | 2.3 (1.0-5.2) | 0.048 |
| **Partner drink behaviour** | n=123 | n=151 |  |  |  |  |
| No, never | 23 (56.1) | 18 (43.9) | 1.0 |  | 1.0 |  |
| Yes, he drinks | 128 (54.9) | 105 (45.1) | 2.1 (0.7-6.4) | 0.202 | 1.2 (0.4-3.2) | 0.726 |
| **Partners units per week** | n=84 | n=101 |  |  |  |  |
| 2 units per week or less | 21 (56.8) | 16 (43.2) | 1.0 |  | 1.0 |  |
| More than 2 units per week | 80 (54.1) | 68 (45.9 | 1.1 (0.6-2.3) | 0.768 | 1.2 (0.4-3.1) | 0.773 |
| **Partner binge drinking** | n=93 | n=114 |  |  |  |  |
| No | 47 (53.4) | 41 (46.6) | 1.0 |  | 1.0 |  |
| Yes | 67 (56.3) | 52 (43.7) | 0.9 (0.5-1.5) | 0.679 | 1.5 (0.6-3.3) | 0.392 |
| **Partners smoking** | n=146 | n=123 |  |  |  |  |
| No, never | 96 (55.2) | 78 (44.8) | 1.0 |  | 1.0 |  |
| Yes, smokers (now or before pregnancy) | 50 (52.6) | 45 (47.4) | 1.1 (0.7-1.8) | 0.689 | 1.3 (0.6-2.8) | 0.522 |
|  |  |  |  |  |  |  |
| **Partner smoking frequency** | n=40 | n=46 |  |  |  |  |
| Some days | 10 (71.4) | 4 (28.4) | 1.0 |  | 1.0 |  |
| Everyday | 36 (50.0) | 36 (50.0) | 0.4 (0.1-1.4) | 0.150 | 0.2 (0.02-2.2) | 0.206 |
| **Partner smoking behaviour** | n=42 | n=41 |  |  |  |  |
| Never smokes around me | 26 (57.8) | 19 (42.2) | 1.0 |  | 1.0 |  |
| Occasionally/Usually smokes around me | 15 (39.5) | 23 (60.5) | 2.1 (0.9-5.0) | 0.099 | 2.5 (0.5-12.3) | 0.261 |

Model I: Univariate unadjusted model

Model II: Multivariate model adjusted for maternal age (continuous), presentation (dichotomous), previous miscarriage (dichotomous), nausea and vomiting (dichotomous), BMI (continuous).

**Supplemental Table 3. Odds Ratios for miscarriage (<24 weeks): traumatic and stressful life events.**

| **Total** | **All**  ***n*** | **Miscarriage**  ***n* (%)** | **Pregnancy**  ***n* (%)** | **Model I**  **OR**  **(95% CI)** | **Model II**  **OR**  **(95% CI)** |
| --- | --- | --- | --- | --- | --- |
| **Job generally demanding** | 280 | 67 (42.4) | 91 (57.6) | 0.8 (0.5-1.3) | 0.5 (0.3-1.1) |
| **Job insecurity** | 279 | 20 (46.5) | 23 (53.3) | 1.1 (0.6-2.0) | 1.2 (0.4-3.1) |
| **Husband lost job** | 280 | 29 (40.3) | 43 (59.7) | 0.8 (0.5-1.3) | 0.9 (0.4-2.1) |
| **Separation/divorce** | 279 | 7 (53.8) | 6 (46.2) | 1.4 (0.5-4.4) | 1.6 (0.3-8.5) |
| **Financial problems** | 280 | 22 (47.8) | 24 (52.2) | 1.2 (0.6-2.2) | 1.2 (0.5-3.0) |
| **Accident** | 280 | 11 (50.0) | 11 (50.0) | 1.2 (0.5-3.0) | 1.1 (0.3-4.1) |
| **Serious illness** | 280 | 9 (52.9) | 8 (47.1) | 1.4 (0.5-3.7) | 1.3 (0.3-5.5) |
| **Illness of someone close** | 280 | 32 (51.6) | 30 (48.4) | 1.4 (0.8-2.4) | 1.2 (0.5-2.7) |
| **Death of someone close** | 280 | 38 (45.8) | 45 (54.2) | 1.1 (0.6-1.8) | 1.2 (0.6-2.7) |
| **Death of a child** | 277 | 3 (50.0) | 3 (50.0) | 1.2 (0.2-6.3) | 0.5 (0.07-3.4) |
| **Stillbirth** | 276 | 6 (54.5) | 5 (45.5) | 1.5 (0.4-5.0) | 0.6 (0.1-2.7) |
| **Other stressful/trauma situations** | 276 | 20 (44.4) | 25 (55.6) | 1.0 (0.5-1.9) | 0.8 (0.3-2.3) |

Model I: Univariate unadjusted model

Model II: Multivariate model adjusted for maternal age (continuous), presentation (dichotomous), previous miscarriage (dichotomous), nausea and vomiting (dichotomous), BMI (continuous).
